# Supplementary material for: Chemically and thermally activated persulfate for theophylline degradation and application to pharmaceutical factory effluent
Source: Royal Society of Chemistry journal article supplement (doi:10.1039/c9ra05362j), 2019-01-01
Supplement: c9ra05362j1.pdf [file c9ra05362j1.pdf]

## **Chemically and thermally activated persulfate for theophylline degradation and application to a pharmaceutical factory effluent**

Suha Al Hakim, Abbas Baalbaki, Omar Tantawi and Antoine Ghauch\*

*American University of Beirut, Faculty of Arts and Sciences, Department of Chemistry*

*P.O. Box 11-0236 Riad El Solh – 1107-2020 Beirut – Lebanon*

*\*Corresponding author. Tel/fax: +961 1350000/+961 1 365217 Email address: antoine.ghauch@aub.edu.lb*

**Prepared for RSC**

**September 2019**

**Electronic supplementary information**

9 Pages, 3 Texts, 8 Figures, 2 Tables

| (b)                                                       |                                                                                   | (c)                                     |             |                                         |                                                                                     |
|-----------------------------------------------------------|-----------------------------------------------------------------------------------|-----------------------------------------|-------------|-----------------------------------------|-------------------------------------------------------------------------------------|
| Chemical formula and CAS number                           | Chemical structure                                                                | Molecular weight (g mol <sup>-1</sup> ) | pKa         | Water solubility (mg mL <sup>-1</sup> ) | Spectrum                                                                            |
| C <sub>7</sub> H <sub>8</sub> N <sub>4</sub> O<br>58-55-9 | 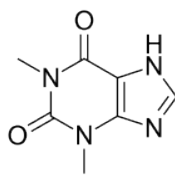 | 180.164                                 | 8.81<br>[1] | 8.3                                     |  |

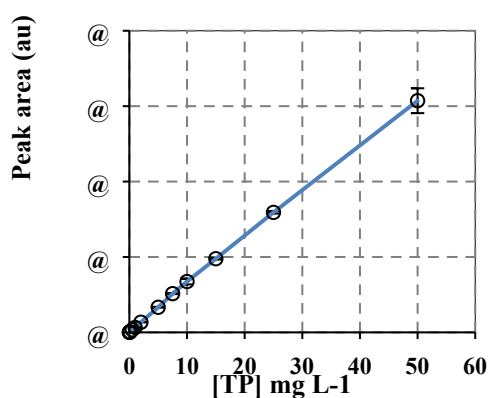

**Fig. 1S.** (a) Table showing selected TP chemical and physical properties. (b) Calibration curve of TP

| LINEST Output        |       |                      |       |
|----------------------|-------|----------------------|-------|
| y=mx+b               |       |                      |       |
| <b>m</b>             | 309.4 | <b>b</b>             | 79.19 |
| <b>s<sub>m</sub></b> | 2.466 | <b>s<sub>b</sub></b> | 39.20 |
| <b>R<sup>2</sup></b> | 0.999 | <b>s<sub>y</sub></b> | 125.1 |

obtained using HPLC/DAD instrument at a wavelength

of 270 nm, over a linear dynamic range of 0.02-50 mg L<sup>-1</sup> with a detection limit = 0.0176 mg L<sup>-1</sup> and quantification limit = 0.0586 mg L<sup>-1</sup>. (c) LINEST output for TP calibration curve.

## Text S1

### Theophylline calibration curve

Selected TP physical properties are summarized in Fig. 1S (a). Calibration curve obtained for TP at a wavelength of 270 nm is presented in Fig. 1S(b). High linearity ( $R^2 = 0.999$ ) is obtained over a linear dynamic range of 0.02-50 mg L<sup>-1</sup> with a detection limit = 0.0176 mg L<sup>-1</sup> and quantification limit = 0.0586 mg L<sup>-1</sup>. Error bars for calibration curve are calculated as

$$A = A_{average} \pm \frac{ts}{\sqrt{n}}, \text{ where } n \text{ is the number of replicates, } t \text{ is student value for 95\%}$$

confidence ( $t = 4.303$  for 2 degrees of freedom) and  $s$  is the standard deviation of the three replicates tested.

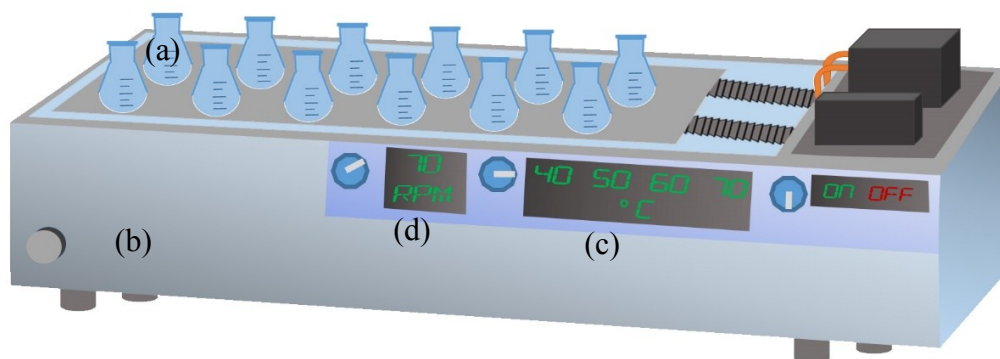

**Fig. 2S.** Experimental setup showing (a) reactors in (b) water bath equipped with (c) temperature control, and (d) automatic shaker. Temperature is displayed in °C and shaker in revolutions per minute (RPM).

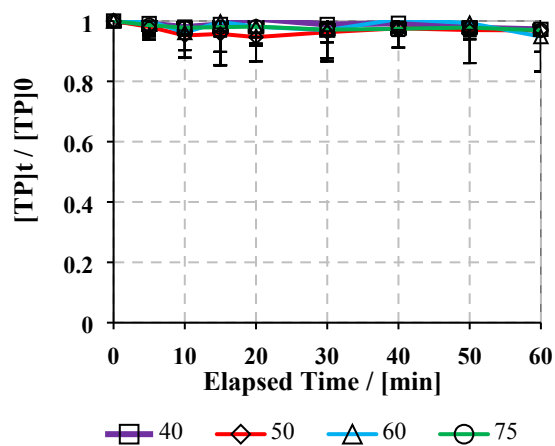

**Fig. 3S.** Stability of TP under heat stress. Experimental conditions:  $[TP]_0 = 10 \text{ mg L}^{-1}$ , Temperature = 40, 50, 60 and 75°C.

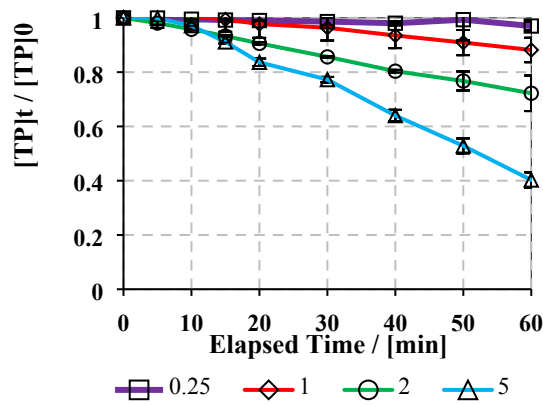

**Fig. 4S.** Effect of  $[PS]_0$  on TP degradation in TAP systems. Experimental conditions:  $[TP]_0 =$

$10 \text{ mg L}^{-1}$ ,  $[PS]_0 = 0.25\text{-}5 \text{ mM}$  and  $T = 60^\circ\text{C}$ . Error bars are calculated as  $\frac{ts}{\sqrt{n}}$ , where absent

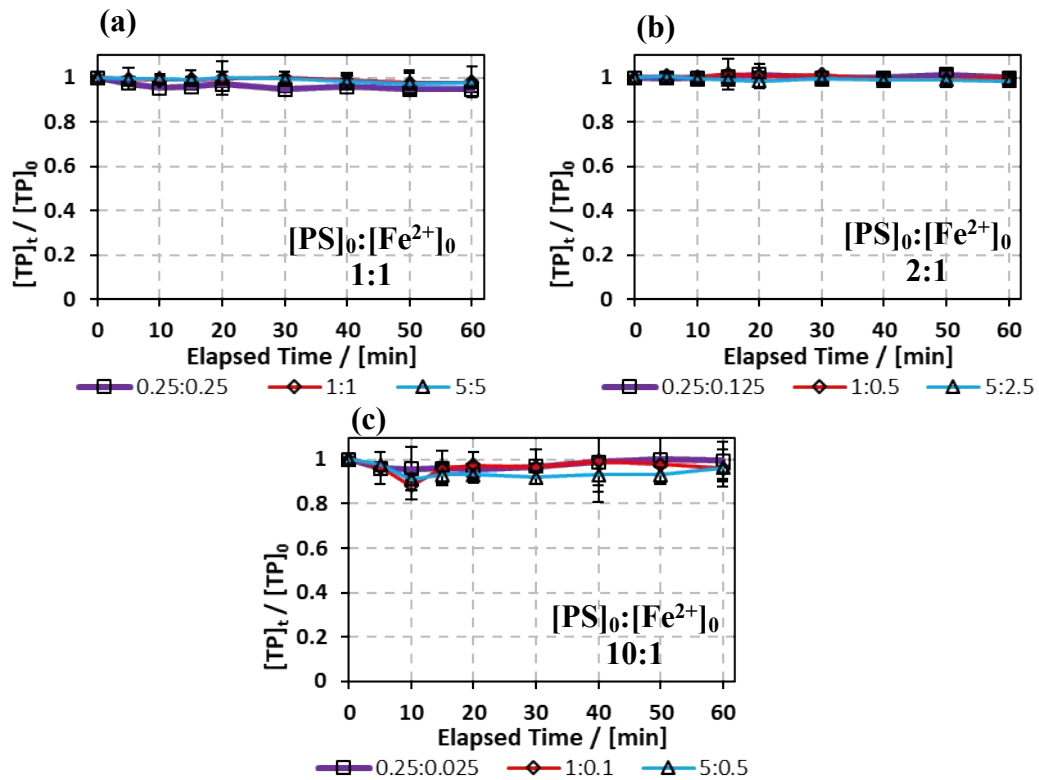

bars fall within the symbols.

**Fig. 5S.** Effect of  $[PS]_0:[Fe^{2+}]_0$  ratio on TP degradation in CAP system. Experimental conditions:  $[TP]_0 = 10 \text{ mg L}^{-1}$ ,  $[PS]_0 = 0.25, 1$  and  $5 \text{ mM}$ ,  $T = 20^\circ\text{C}$ , and  $[PS]_0:[Fe^{2+}]_0$  ratio is

(a) 1:1 (b) 2:1 and (c) 10:1. Error bars are calculated as  $\frac{ts}{\sqrt{n}}$ , where absent bars fall within the symbols.



## Text S2

### Kinetics study in TAP system

Kinetics study was done in TAP system, for  $T = 55-60^{\circ}\text{C}$ ,  $[\text{PS}]_0 = 0.25-5 \text{ mM}$  and  $[\text{TP}]_0 = 10 \text{ mg L}^{-1}$ . Eq. (1) presents the pseudo-first order rate equation, with  $k_{\text{obs}}$  representing the pseudo-first-order rate constant ( $\text{min}^{-1}$ ), and  $t$  representing time (min). Table S1 shows the calculated observed rate constant ( $k_{\text{obs}}$ ) for the different conditions, with the corresponding linearity constant for each plot of  $\ln \frac{[\text{TP}]}{[\text{TP}_0]}$  versus time. The high linearity frequently obtained proves that the reaction follows a pseudo-first order rate. Pseudo-first order kinetics is frequently considered for degradation reactions of organic contaminants by activated PS [2–6].

**Table 1S.**

TP degradation in TAP system at  $T = 55-60^{\circ}\text{C}$ ,  $[\text{PS}]_0 = 0.25-5 \text{ mM}$  and  $[\text{TP}]_0 = 10 \text{ mg L}^{-1}$  for all studied cases.  $k_{\text{obs}}$  is calculated for pseudo-first order reaction rate and the corresponding linearity constant ( $R^2$ ) and reaction half-life ( $t_{1/2}$ ) are presented.

| $[\text{TP}]_0$<br>$\text{mg L}^{-1}$ | T<br>$^{\circ}\text{C}$ | $[\text{PS}]_0$<br>$\text{mM}$ | $k_{\text{obs}}$<br>$\text{min}^{-1}$ | $R^2$ | $t_{1/2}$<br>$\text{min}$ |
|---------------------------------------|-------------------------|--------------------------------|---------------------------------------|-------|---------------------------|
| 10                                    | 55                      | 2                              | $2.63 (\pm 0.04) \times 10^{-3}$      | 0.998 | 263                       |
|                                       |                         | 0.25                           | $3.8 (\pm 0.1) \times 10^{-4}$        | 0.680 | $17 \times 10^2$          |
|                                       | 60                      | 1                              | $2.2 (\pm 0.1) \times 10^{-3}$        | 0.959 | $30 \times 10^1$          |
|                                       |                         | 2                              | $5.52 (\pm 0.08) \times 10^{-3}$      | 0.998 | 125                       |
|                                       |                         | 5                              | $1.5 (\pm 0.1) \times 10^{-2}$        | 0.956 | 46                        |
|                                       | 65                      |                                | $1.43 (\pm 0.05) \times 10^{-2}$      | 0.988 | 48.2                      |
|                                       | 70                      | 2                              | $4.6 (\pm 0.5) \times 10^{-2}$        | 0.928 | 15                        |
|                                       | 75                      |                                | $5.3 (\pm 0.7) \times 10^{-2}$        | 0.918 | 13                        |

$$\ln \frac{[\text{TP}]}{[\text{TP}_0]} = -k_{\text{obs}}t \quad (1)$$

Text S3

Kinetics study in TCAP system

Kinetics study was done in TCAP system at  $[PS]_0 = 0.25 - 5 \text{ mM}$ ,  $[PS]_0:[Fe^{2+}]_0$  ratio of 1:1, and  $T = 60^\circ\text{C}$ . Eq. (1) presenting the pseudo-first order rate was fitted. Table 3 shows the calculated observed rate constant ( $k_{obs}$ ) for the different  $[PS]_0$ , with the corresponding

linearity constant for each plot of  $\ln \frac{[TP]}{[TP]_0}$  versus time. The high linearity frequently obtained

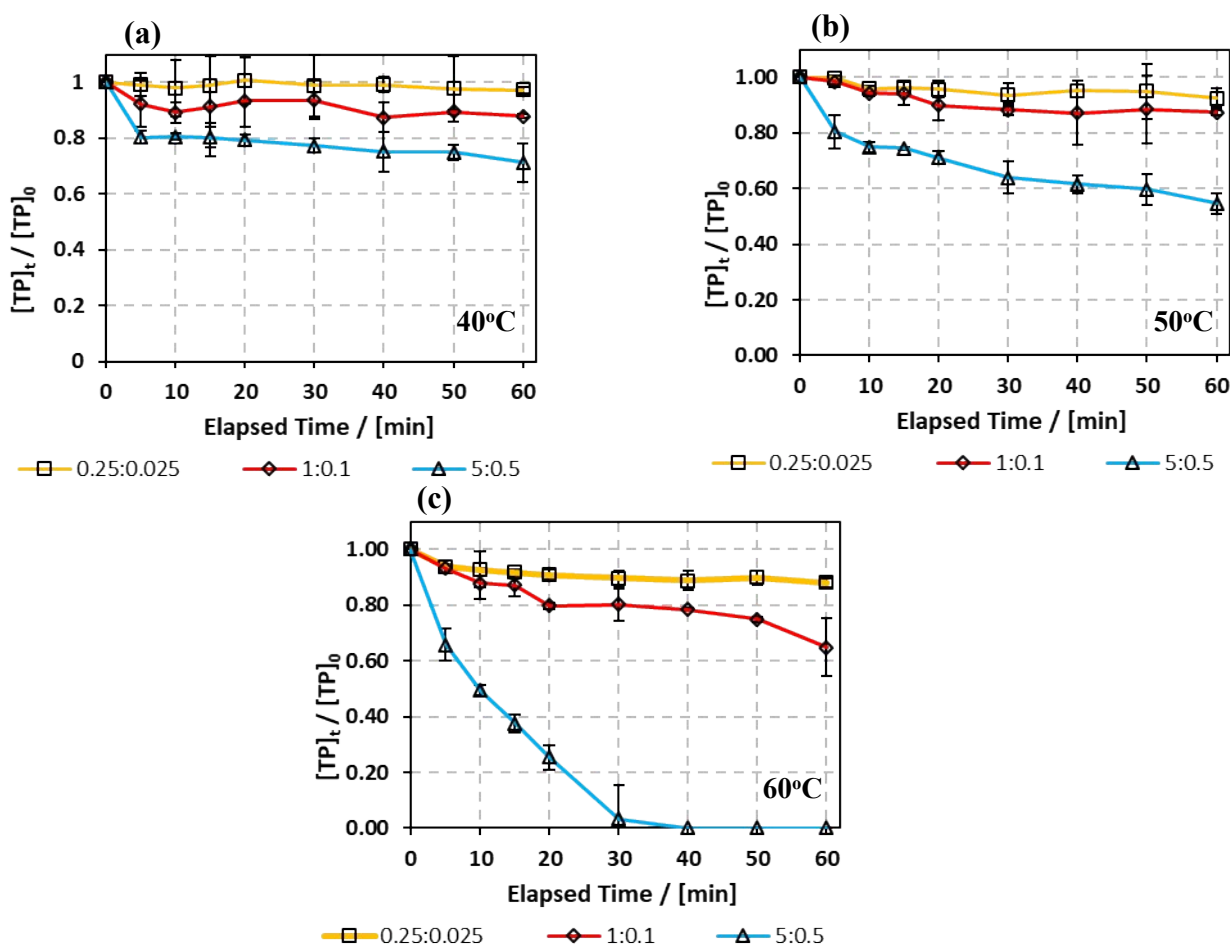

proves that the reaction follows a pseudo-first order rate.

**Fig. 6S.** Effect of temperature on the degradation of TP in TCAP system. Experimental conditions:  $[TP]_0 = 10 \text{ mg L}^{-1}$ ,  $[PS]_0 = 0.25, 1 \text{ and } 5 \text{ mM}$ ,  $[PS]_0:[Fe^{2+}]_0$  ratio is 10:1, and

temperature is (a) 40°C (b) 50°C and (c) 60°C. Error bars are calculated as  $\frac{ts}{\sqrt{n}}$ , where absent bars fall within the symbols.

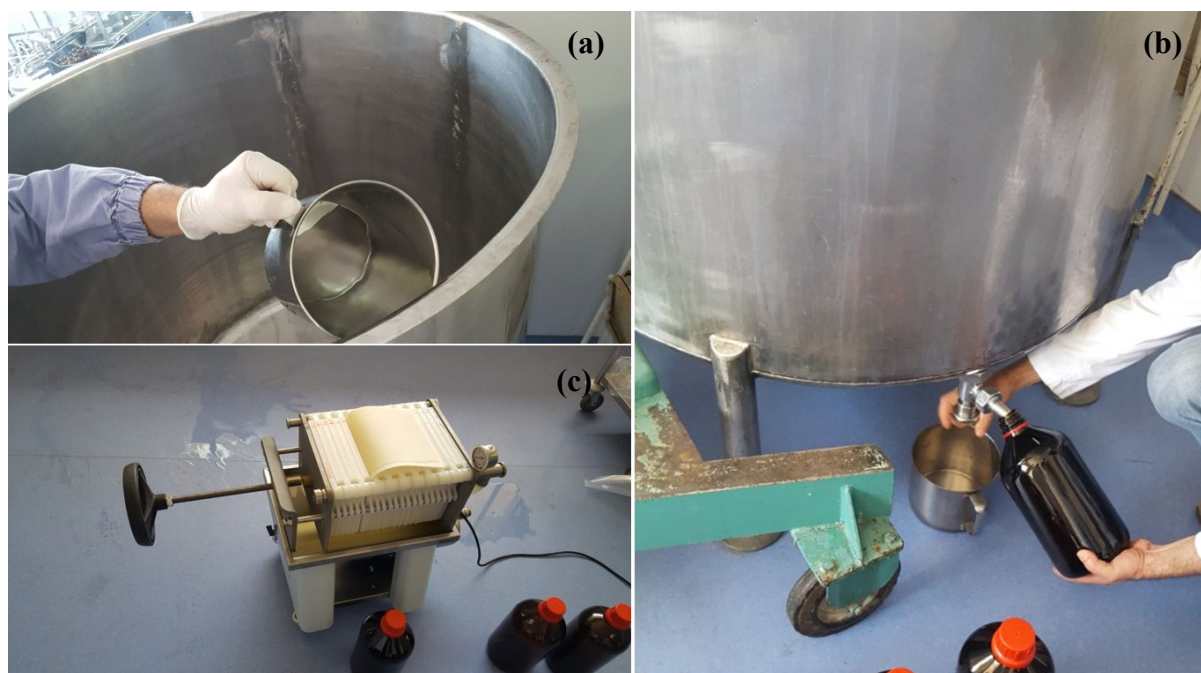

**Fig. 7S.** Collecting pharmaceutical water effluent. (a) Washing of the 1000 L 316 SS L mixing container, (c) water collected from the container, and (c) the filter press used in the manufacturing process.

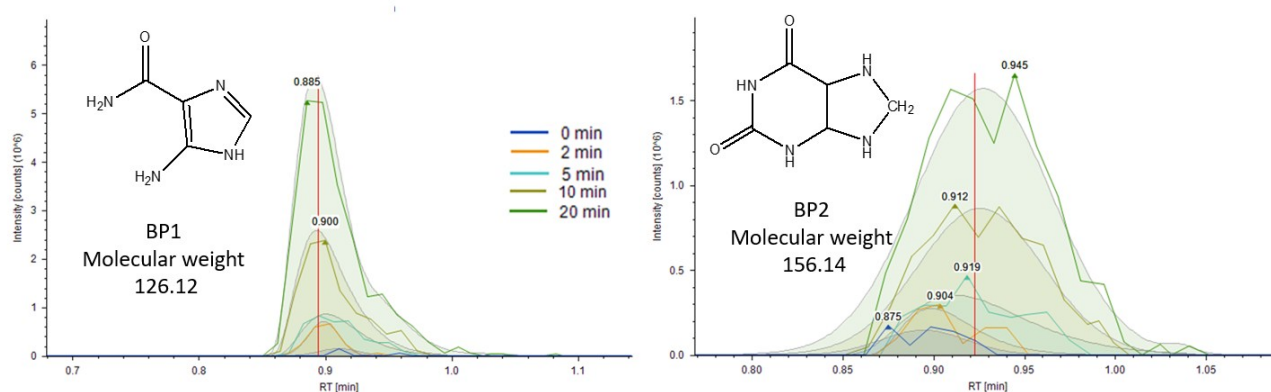

**Fig. 8S.** Extracted chromatograms of two by-products detected by LC/MS/MS. Intensity of peaks is displayed at reaction time 0 – 20 min.



**Table 2S.**

Masses and prices of reagents used based on commercial prices where 1 kg of PS costs 2 US \$<sup>a</sup>, 1 Kg of FeCl<sub>2</sub>·4H<sub>2</sub>O costs 1.7 US \$<sup>b</sup>, and 1 L of HCl (37%), used to dissolve the iron salt, costs 0.3 US \$<sup>c</sup>.

|                                                   |         |         |        |        |
|---------------------------------------------------|---------|---------|--------|--------|
| [PS] <sub>0</sub> mM                              | 25      | 50      | 75     | 100    |
| [Fe <sup>2+</sup> ] <sub>0</sub> mM               | 25      | 50      | 75     | 100    |
| Reactor volume L                                  | 0.2     | 0.2     | 0.2    | 0.2    |
| n PS mol                                          | 0.005   | 0.01    | 0.015  | 0.02   |
| n Fe mol                                          | 0.005   | 0.01    | 0.015  | 0.02   |
| m Na <sub>2</sub> S <sub>2</sub> O <sub>8</sub> g | 1.19    | 2.38    | 3.57   | 4.76   |
| m FeCl <sub>2</sub> ·4H <sub>2</sub> O g          | 0.994   | 1.99    | 2.98   | 3.98   |
| v HCl (37%) mL                                    | 1.25    | 2.50    | 3.75   | 5.00   |
| Total cost \$ reactor <sup>-1</sup>               | 0.00445 | 0.00889 | 0.0133 | 0.0178 |
| Total cost \$ m <sup>-3</sup>                     | 22.2    | 44.5    | 66.7   | 88.9   |

<sup>a</sup> Based on price obtained from Jinan Shijitongda Chemical Co., Ltd.

<sup>b</sup> Based on price obtained from Gemhold (SJZ) Trading Co., Ltd.

<sup>c</sup> Based on price obtained from Hangzhou Focus Corporation.

## References

- [1] Dissociation constants of organic acids in aqueous solution , *Pure Appl. Chem.* . 1 (1960) 187. doi:10.1351/pac196001020187.
- [2] C. Qi, X. Liu, C. Lin, X. Zhang, J. Ma, H. Tan, W. Ye, Degradation of sulfamethoxazole by microwave-activated persulfate: Kinetics, mechanism and acute toxicity, *Chem. Eng. J.* 249 (2014) 6–14. doi:<https://doi.org/10.1016/j.cej.2014.03.086>.
- [3] X. Lu, Y. Shao, N. Gao, J. Chen, Y. Zhang, H. Xiang, Y. Guo, Degradation of diclofenac by UV-activated persulfate process: Kinetic studies, degradation pathways and toxicity assessments, *Ecotoxicol. Environ. Saf.* 141 (2017) 139–147. doi:<https://doi.org/10.1016/j.ecoenv.2017.03.022>.
- [4] S. Dhaka, R. Kumar, M.A. Khan, K.-J. Paeng, M.B. Kurade, S.-J. Kim, B.-H. Jeon, Aqueous phase degradation of methyl paraben using UV-activated persulfate method, *Chem. Eng. J.* 321 (2017) 11–19. doi:<https://doi.org/10.1016/j.cej.2017.03.085>.
- [5] C. Tan, N. Gao, S. Zhou, Y. Xiao, Z. Zhuang, Kinetic study of acetaminophen degradation by UV-based advanced oxidation processes, *Chem. Eng. J.* (2014). doi:10.1016/j.cej.2014.05.013.
- [6] L. Zhao, H. Hou, A. Fujii, M. Hosomi, F. Li, Degradation of 1,4-dioxane in water with heat and Fe<sup>2+</sup> activated persulfate oxidation, *Environ. Sci. Pollut. Res.* 21 (2014) 7457–7465. doi:10.1007/s11356-014-2668-3.
